# Supplementary material
Source: PubMed Central journal article supplement (PMC2838136)
Supplement: supp_84_7_3303__1.pdf [file supp_84_7_3303__1.pdf]

Table 1. Oligonucleotides for site-directed mutagenesis

| Primer name | Sequence (5' to 3')                                                          | Description                                                           |
|-------------|------------------------------------------------------------------------------|-----------------------------------------------------------------------|
| C298A-F     | CAG CTA AAT GAA TCT GTA<br>GTA ATT AAC GCT ACA AGA<br>CCC AAC AAC AAT ACA AG | For mutating cysteine 298 to alanine; deletes 1 <i>VspI</i> site      |
| C298A-R     | CTT GTA TTG TTG TTG GGT<br>CTT GTA GCG TTA ATT ACT<br>ACA GAT TCA TTT AGC TG |                                                                       |
| C332A-F     | TAG GAG ATA TCA GAC AAG<br>CAC ATG CTA ACA TTA GTA<br>GAG CAA AAT GGA ATA AC | For mutating cysteine 331 to alanine; creates 1 new <i>EcoRV</i> site |
| C332A-R     | GTT ATT CCA TTT TGC TCT<br>ACT AAT GTT AGC ATG TGC<br>TTG TCT GAT ATC TCC TA |                                                                       |
| C378A-F     | CCA GAA ATT GTA ATG CAC<br>AGT TTT AAT GCT GGA GGG<br>GAA TTC TTC TAC TGT A  | For mutating cysteine 378 to alanine; creates 1 new <i>EcoRI</i> site |
| C378A-R     | TAC AGT AGA AGA ATT CCC<br>CTC CAG CAT TAA AAC TGT<br>GCA TTA CAA TTT CTG G  |                                                                       |
| C441A-F     | CCC ATC ACA GGA CAA ATT<br>AGA GCT TCA TCA AAC ATT<br>ACA GGG CTG            | For mutating cysteine 441 to alanine; deletes 1 <i>SspI</i> site      |
| C441A-R     | CAG CCC TGT AAT GTT TGA<br>TGA AGC TCT AAT TTG TCC<br>TGT GAT GGG            |                                                                       |
| C385A-F     | TGT GGA GGG GAA TTC TTC<br>TAC GCT AAT ACA GCA CAA<br>CTG TTT AAT AG         | For mutating cysteine 385 to alanine; creates 1 new <i>EcoRI</i> site |
| C385A-R     | CTA TTA AAC AGT TGT GCT<br>GTA TTA GCG TAG AAG AAT<br>TCC CCT CCA CA         |                                                                       |
| C414A-F     | GGA AAT GAC ATA ATC ACA<br>CTC CAA GCC AGA ATA AAA                           | For mutating cysteine 414 to alanine ; creates 1 new                  |

| Primer name | Sequence (5' to 3')                                                             | Description      |
|-------------|---------------------------------------------------------------------------------|------------------|
|             | CAA ATT ATT ATT ATG TGG C                                                       | <i>VspI</i> site |
| C414A-R     | GCC ACA TAT TAA TAA TTT<br>GTT TTA TTC TGG CTT GGA<br>GTG TGA TTA TGT CAT TTC C |                  |

Table 2. Peptide sequences corresponding to gp120s from SHIV 89.6p and HIV 89.6

| Peptide | 89.6p                                  | 89.6                                   |
|---------|----------------------------------------|----------------------------------------|
| 1       | <u>TE</u> KLWVTVYYGVPVWREATT           | <u>KE</u> KTWVTIYYGVPVWREATT           |
| 2       | GVPVWREATTTLFCASDAKA                   | GVPVWREATTTLFCASDAKA                   |
| 3       | TLFCASDAKAYDTEVHNVWA                   | TLFCASDAKAYDTEVHNVWA                   |
| 4       | YDTEVHNVWATHACVPTDPN                   | YDTEVHNVWATHACVPTDPN                   |
| 5       | THACVPTDPNPQEVVLGNVT                   | THACVPTDPNPQEVVLGNVT <u>E</u>          |
| 6       | PQEVVLGNVTENFNMWKNNM                   | PQEVVLGNVTENFNMWKNNM                   |
| 7       | ENFNMWKNNMVDQMHEDIIS                   | ENFNMWKNNMVDQMHEDIIS                   |
| 8       | VDQMHEDIISLWDESLKPCV                   | VDQMHEDIISLWDESLKPCV                   |
| 9       | LWDESLKPCVKLTPLCVTLN                   | LWDESLKPCVKLTPLCVTLN                   |
| 10      | KLTPLCVTLNCTNLNITKNT                   | KLTPLCVTLNCTNLNITKNT                   |
| 11      | CTNLNITKNTTNLTSSSWGGM                  | CTNLNITKNTTNPTSSSWGGM                  |
| 12      | TNLTSSSWGMM <u>E</u> GEIKNCS           | TNPTSSSWGMM <u>KE</u> GEIKNCS          |
| 13      | M <u>E</u> GEIKNCSFYITTSIRNK           | M <u>KE</u> GEIKNCSFYITTSIRNK          |
| 14      | FYITTSIRNKVKKEYALFNR                   | FYITTSIRNKVKKEYALFNR                   |
| 15      | VKKEYALFNRLDVVP <u>V</u> KNT <u>S</u>  | VKKEYALFNRLDVVP <u>I</u> ENT <u>N</u>  |
| 16      | LDVVP <u>V</u> KNT <u>S</u> NTKYRLISCN | LDVVP <u>I</u> ENT <u>N</u> NTKYRLISCN |
| 17      | NTKYRLISCNTSVITQACPK                   | NTKYRLISCNTSVITQACPK                   |
| 18      | TSVITQACPKVSFQPIPIHY                   | TSVITQACPKVSFQPIPIHY                   |
| 19      | VSFQPIPIHYCVPAGFA <u>L</u> IK          | VSFQPIPIHYCVPAGFAM <u>L</u> IK         |
| 20      | CVPAGFA <u>L</u> IKCNNKTFNGSG          | CVPAGFAM <u>L</u> IKCNNKTFNGSG         |
| 21      | CNNKTFNGSGPCTNVSTVQ <u>C</u>           | CNNKTFNGSGPCTNVSTVQ                    |
| 22      | PCTNVSTVQCTHGIRPVVST                   | PCTNVSTVQCTHGIRPVVST                   |
| 23      | THGIRPVVSTQLLNGLSLAE                   | THGIRPVVSTQLLNGLSLAE                   |
| 24      | QLLNGLSLAEEDIVIRSE <u>D</u> F          | QLLNGLSLAEEDIVIRSE <u>N</u> F          |
| 25      | EDIVIRSE <u>D</u> FTDN <u>V</u> KTIIVQ | EDIVIRSE <u>N</u> FTDN <u>A</u> KTIIVQ |
| 26      | TDN <u>V</u> KTIIVQLNESVVINCT          | TDN <u>A</u> KTIIVQLNESVVINCT          |
| 27      | LNESVVINCTRPNNNTR <u>R</u> ERL         | LNESVVINCTRPNNNTR <u>R</u> RL          |
| 28      | RPNNNTR <u>R</u> ERLSIGPGRAFYA         | RPNNNTR <u>R</u> RLSIGPGRAFYA          |
| 29      | SIGPGRAFYARRNIIGDIRQ                   | SIGPGRAFYARRNIIGDIRQ                   |
| 30      | RRNIIGDIRQAHCNISRAKW                   | RRNIIGDIRQAHCNISRAKW                   |
| 31      | AHCNISRAKWNTLQQIVIK                    | AHCNISRAKWNTLQQIVIK                    |
| 32      | NNTLQQIVIKLREKFRNKTI                   | NNTLQQIVIKLREKFRNKTI                   |
| 33      | LREKFRNKTIAFNQSSGG <u>D</u> P          | LREKFRNKTIAFNQSSGGD                    |
| 34      | AFNQSSGGDPEIVMHSFNCG                   | AFNQSSGGDPEIVMHSFNCG                   |
| 35      | EIVMHSFNCGGEFFYCNTAQ                   | EIVMHSFNCGGEFFYCNTAQ                   |
| 36      | GEFFYCNTAQLFNSTWNV <u>A</u> G          | GEFFYCNTAQLFNSTWNV <u>T</u> G          |
| 37      | LFNSTWNV <u>A</u> GGTNGTEGNDI          | LFNSTWNV <u>T</u> GGTNGTEGNDI          |
| 38      | GTNGTEGNDIITLQCRIKQI                   | GTNGTEGNDIITLQCRIKQI                   |
| 39      | ITLQCRIKQIINMWQKVGKA                   | ITLQCRIKQIINMWQKVGKA                   |
| 40      | INMWQKVGKAMYAPPITGQI                   | INMWQKVGKAMYAPPITGQI                   |
| 41      | MYAPPITGQIRCSSNITGLL                   | MYAPPITGQIRCSSNITGLL                   |
| 42      | RCSSNITGLLLTRDGGNSTE                   | RCSSNITGLLLTRDGGNSTE                   |
| 43      | LTRDGGNSTETETEIFRPGG                   | LTRDGGNSTETETEIFRPGG                   |
| 44      | TETEIFRPGGDMRDNRSE                     | TETEIFRPGGDMRDNRSE                     |
| 45      | GMRDNRSELYKYKVVRIE                     | GMRDNRSELYKYKVVRIE                     |
| 46      | LYKYKVVRIEPIGVAPTRAK                   | LYKYKVVRIEPIGVAPTRAK                   |
| 47      | PIGVAPTRAKRRTVQREK <u>R</u> A          | PIGVAPTRAKRRTVQREK <u>R</u> A          |
